SUMMER 2024 | VOLUME 36 | NUMBER 3

# The Journal of Neuropsychiatry

## and Clinical Neurosciences

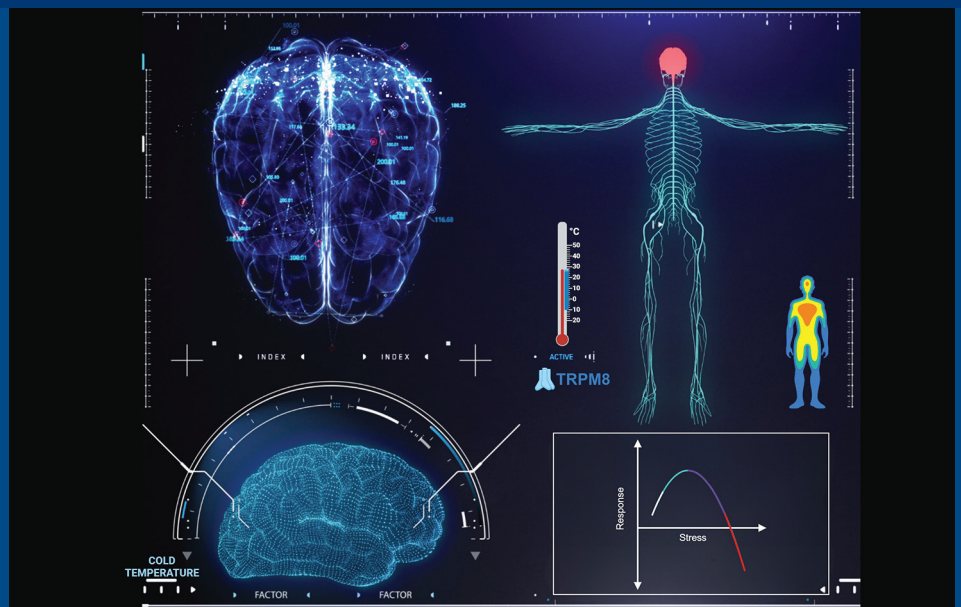

Iron Supplementation in Management of Neurodevelopmental Disorders:  
Systematic Review, Meta-Analysis, and Qualitative Synthesis

Predictive Utility of Diffusion MRI After Mild Traumatic  
Brain Injury in Civilian Populations: A Systematic Review

From Software to Hardware: A Case Series of Functional  
Neurological Symptoms and Cerebrovascular Disease

Harnessing Placebo Effects for the Treatment of  
Functional Cognitive Disorder: A Feasibility Pilot Study

American Neuropsychiatric Association  
2024 Annual Meeting Abstracts

Official Journal of the American Neuropsychiatric Association  
[neuro.psychiatryonline.org](http://neuro.psychiatryonline.org)
